# Supplementary material
Source: publisher figshare collection journal article supplement (https://springernature.figshare.com/ndownloader/files/22955906)
Supplement: Supplementary file 1 [file 22955906]

**Additional file 5: Figure S4.**

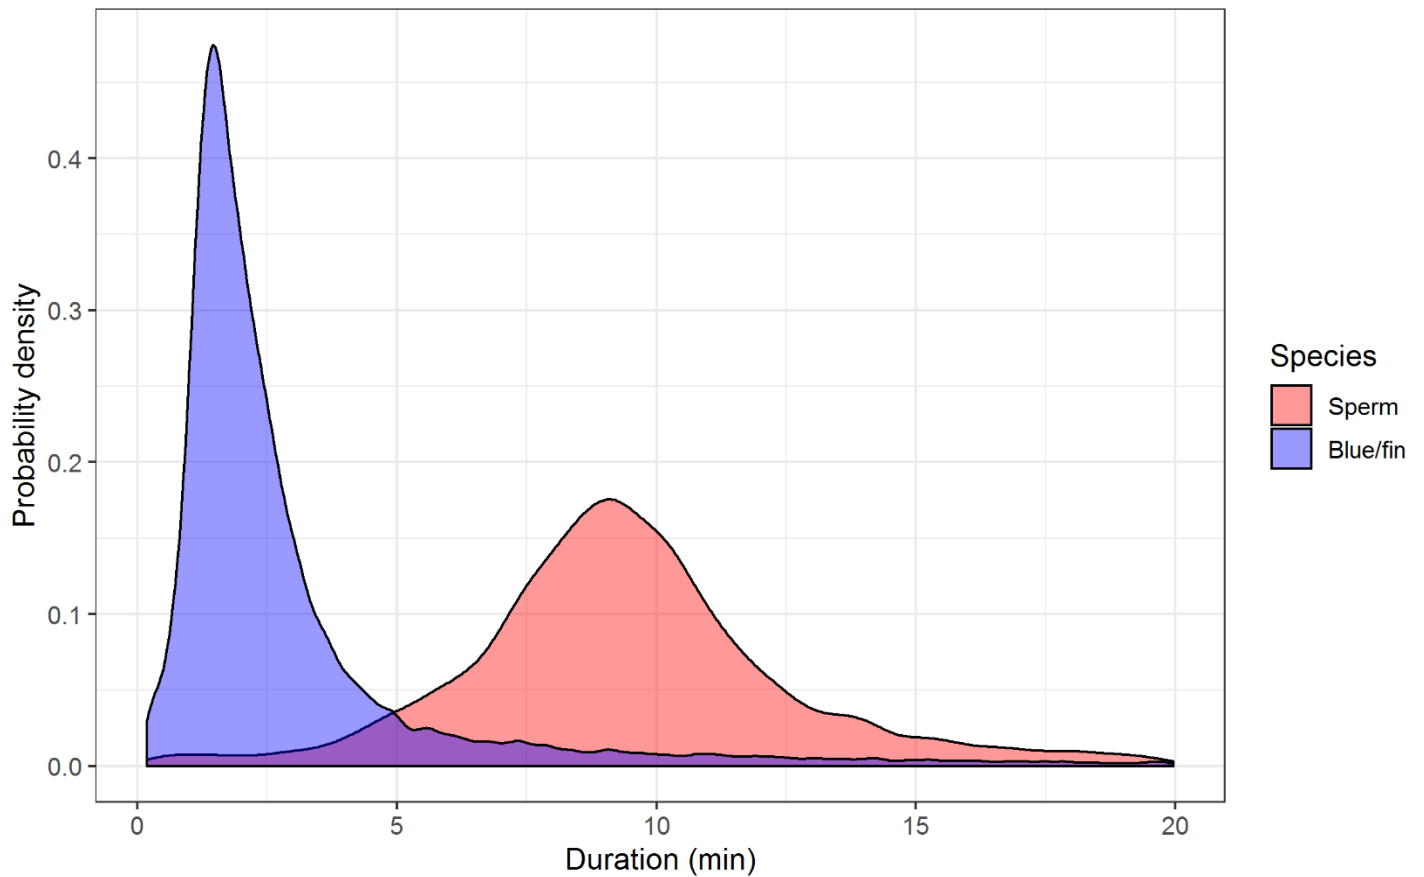

Probability density plot of duration of the post-dive interval (PDI) recorded by all recovered ADB tags. Data are truncated to only PDI < 20 min in duration for better legibility. Data were collected from sperm whales tracked in the Gulf of Mexico during summer 2011 and 2013, and from blue and fin whales tracked off southern California during late summer 2014 and 2015.
